# Supplementary material
Source: PubMed Central journal article supplement (PMC7940597)
Supplement: NIHMS1676219-supplement-1.pdf [file NIHMS1676219-supplement-1.pdf]

## SUPPLEMENTARY FIGURE LEGENDS

**Supplementary Figure S1.** Overview of the study design.

**Supplementary Figure S2.** The discovery phase identified LAMC2 expression and prognostic value for OS in the publicly available datasets. Kaplan-Meier curves for OS in PDAC patients based on LAMC2 expression in (A) GSE71729, (B) GSE21501, and (C) TCGA datasets. (D) The expression of LAMC2 in responders and non-responders in the GSE71729 dataset. \*\*\*,  $P < 0.001$ .

**Supplementary Figure S3.** Univariate and multivariate analysis in the training cohort calculated by Cox regression model.

**Supplementary Figure S4.** A risk-assessment model that combines LAMC2 expression together with CA19-9 levels and lymph node metastasis status is a superior predictor of RFS in PDAC patients in the (A) training and (B) validation cohort. Lymph node metastasis, LNM; LNM positivity, LNP.

**Supplementary Figure S5.** LAMC2 expression predicts therapeutic response to gemcitabine response in PDAC patients treated in adjuvant setting. Kaplan-Meier curves for OS and RFS in PDAC patients for gemcitabine based adjuvant therapy in the training (A, C) and the validation cohort (B, D) or 5-FU based adjuvant therapy in the training (E, G) and the validation cohort (F, H).

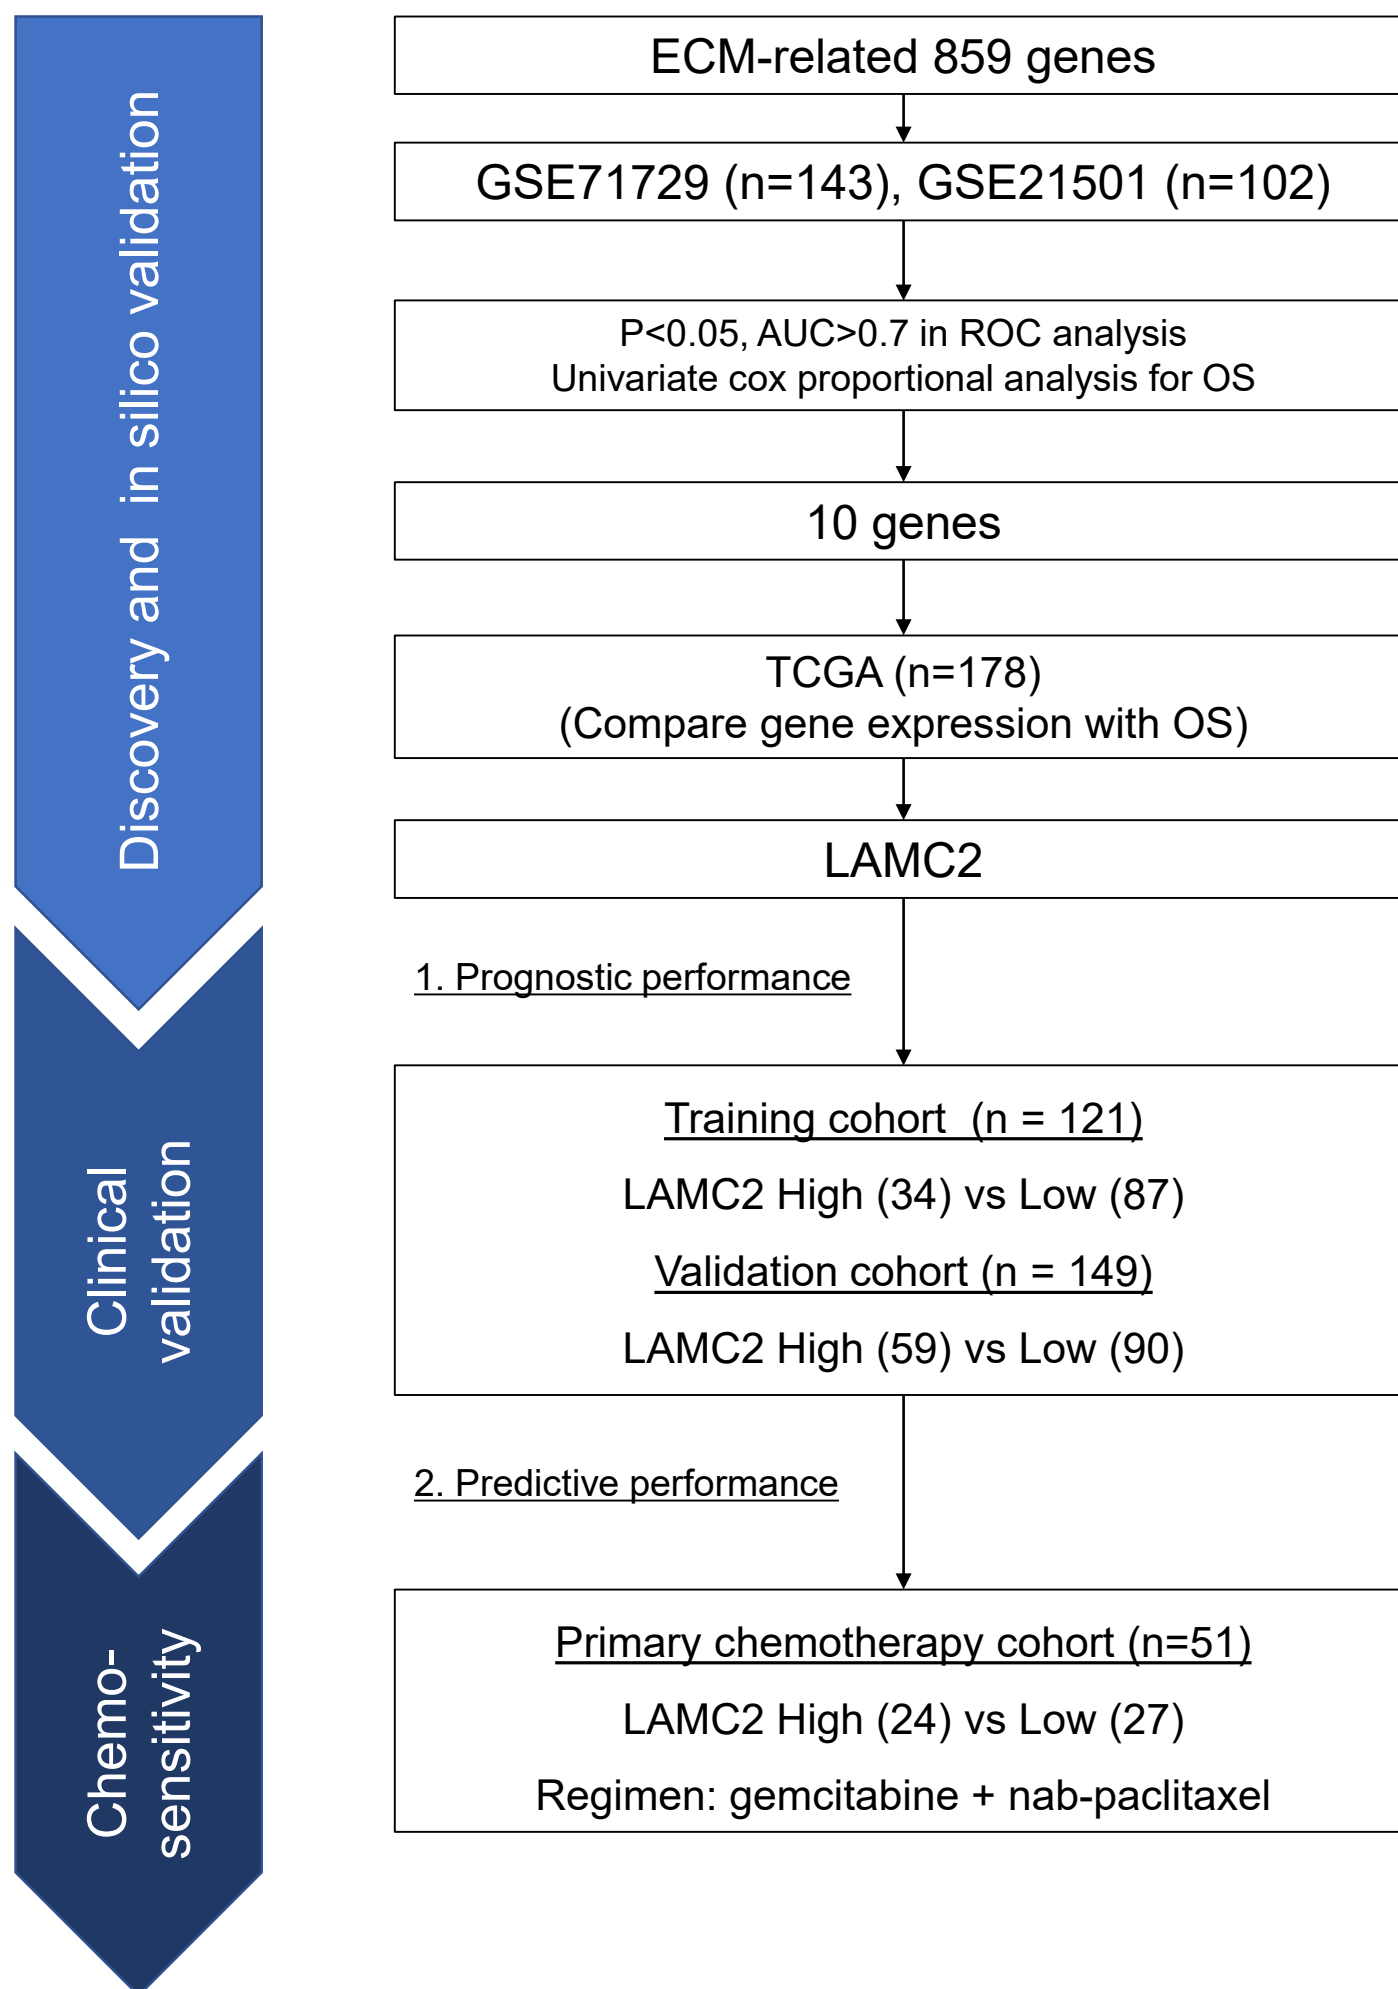

# Supplementary Figure S2

**A**

GSE71729

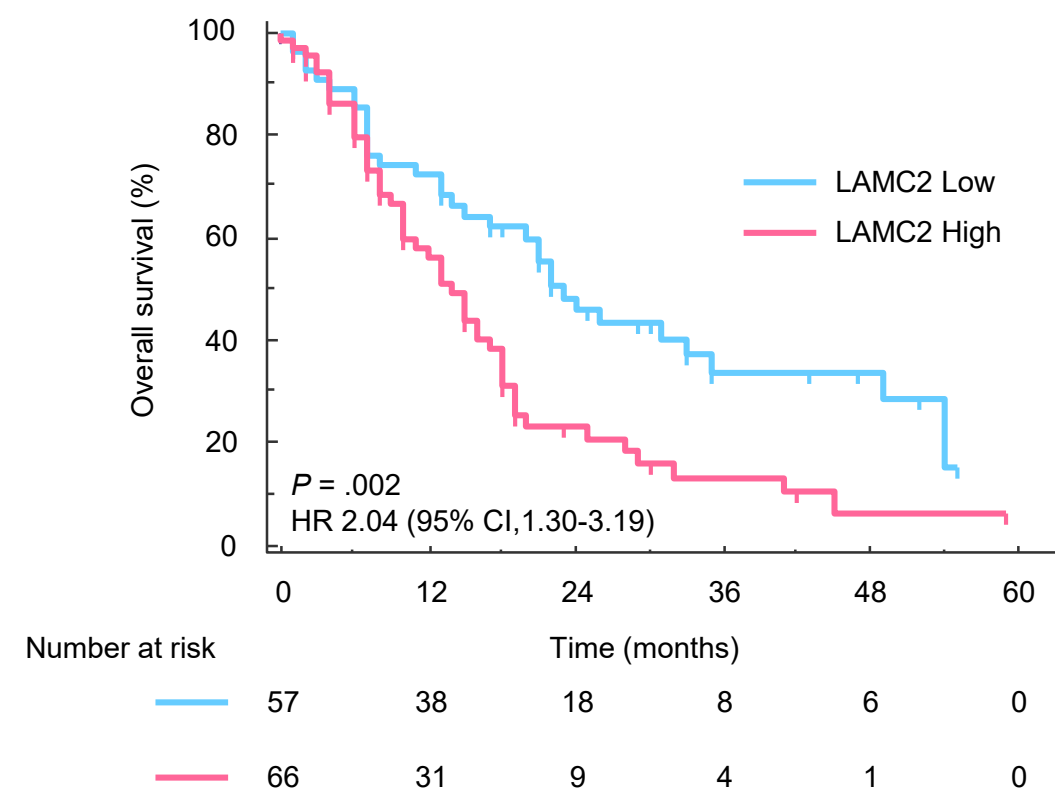

**B**

GSE21501

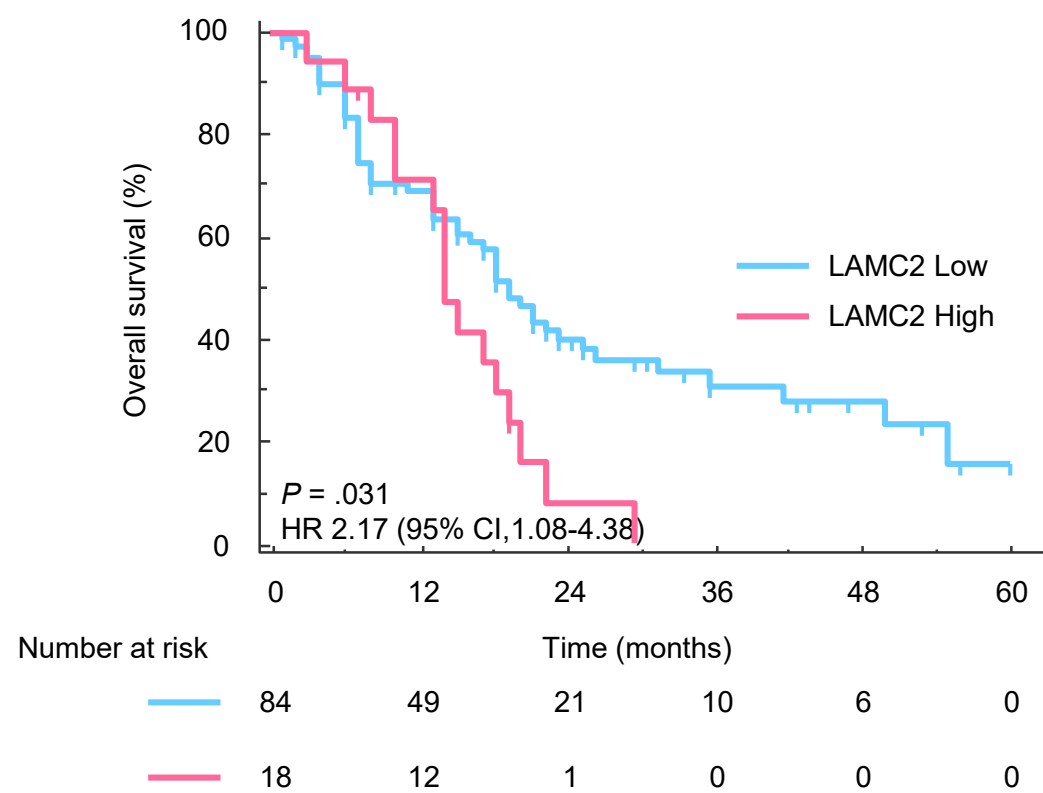

**C**

TCGA

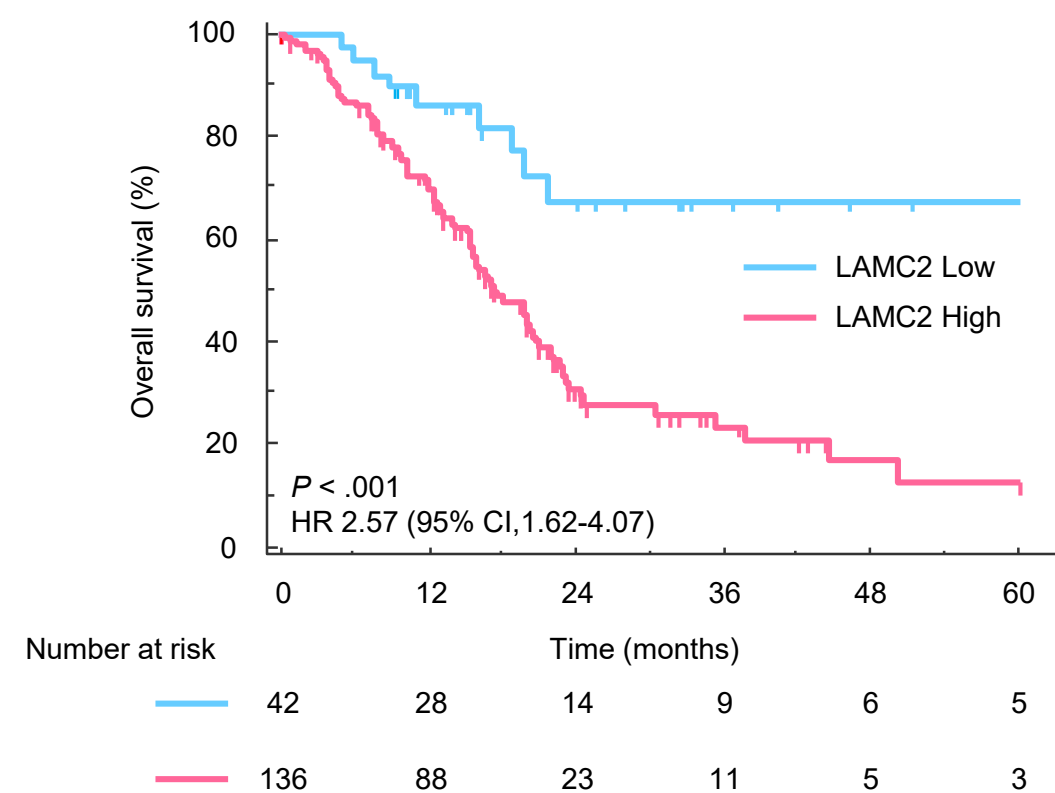

**D**

GSE71729

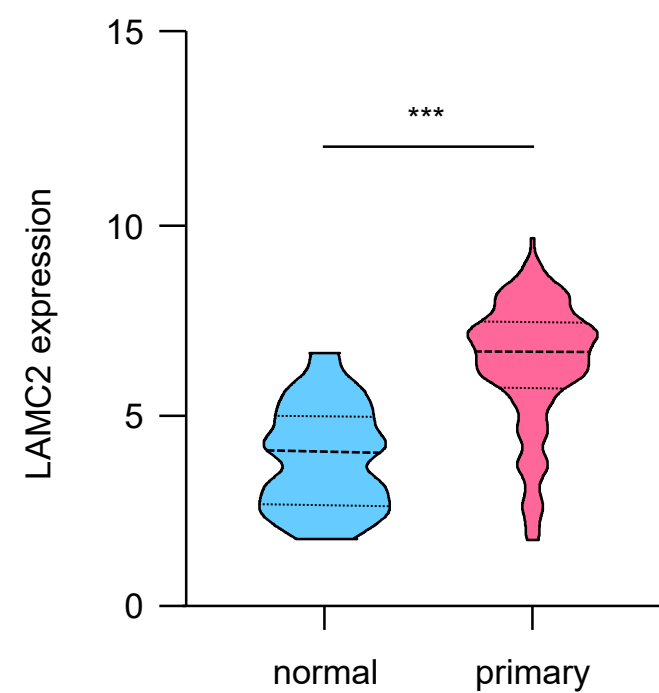

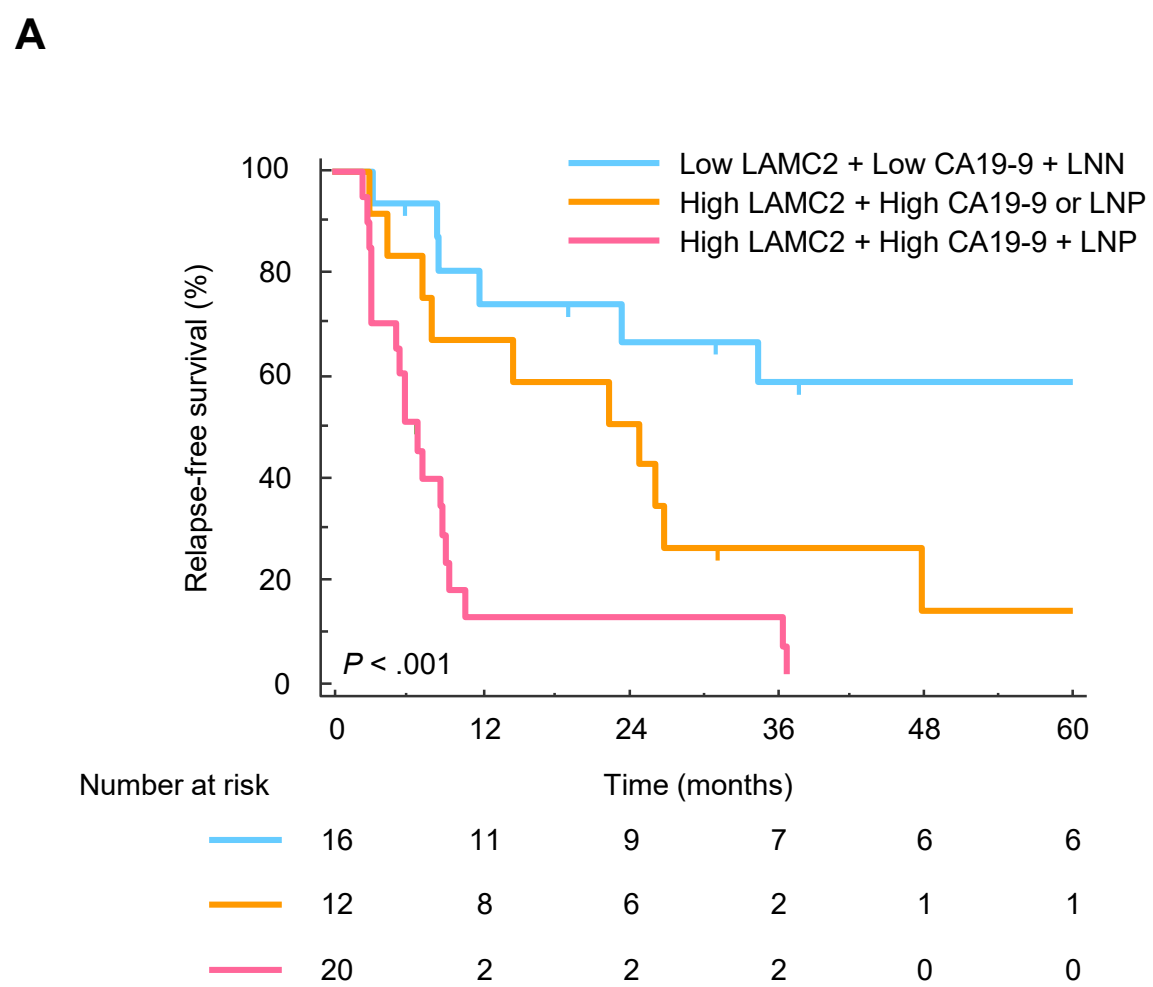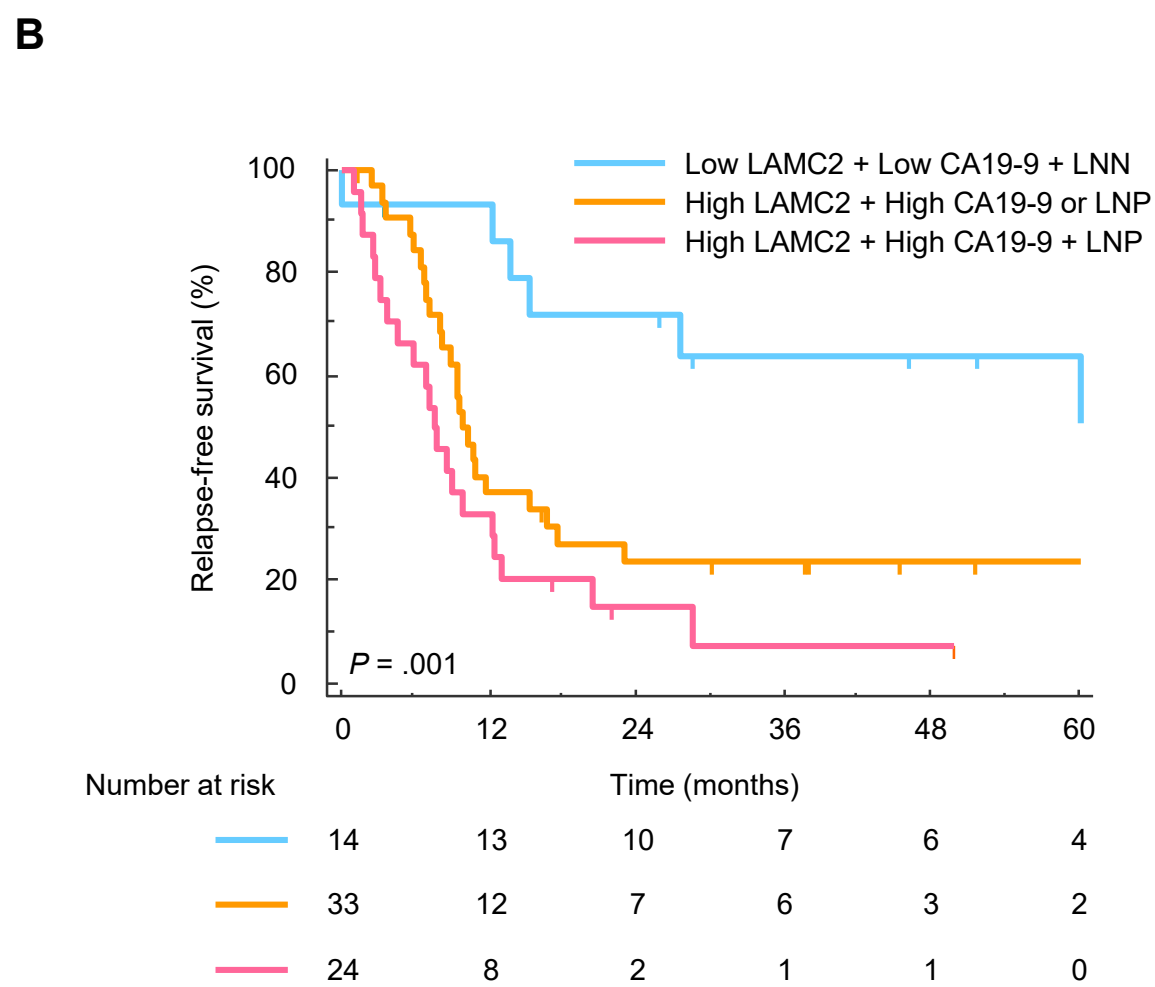

# Supplementary Figure S4

**A**

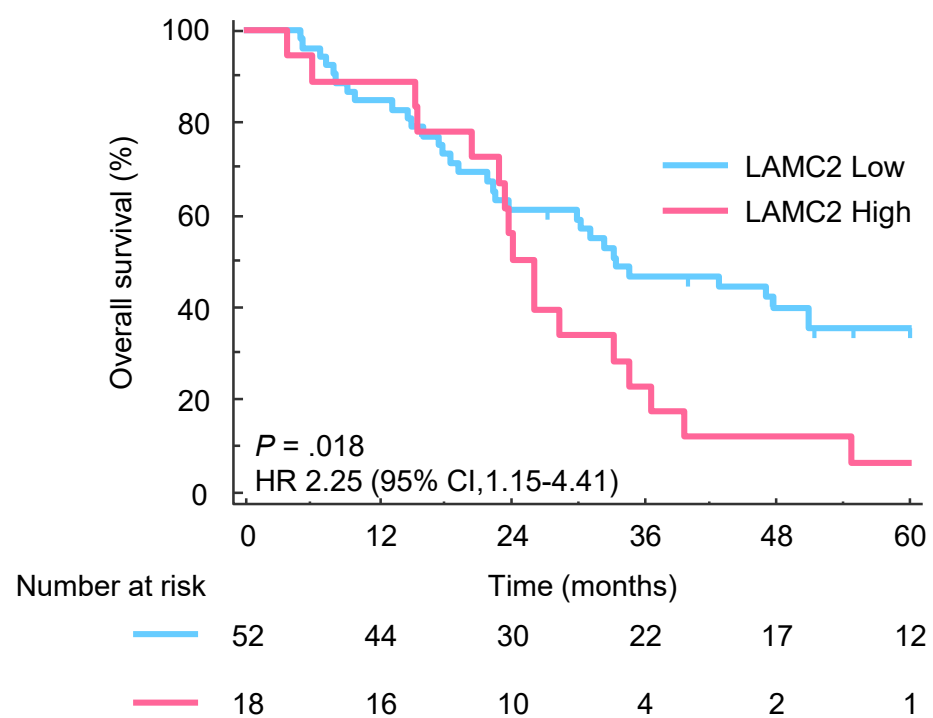

**B**

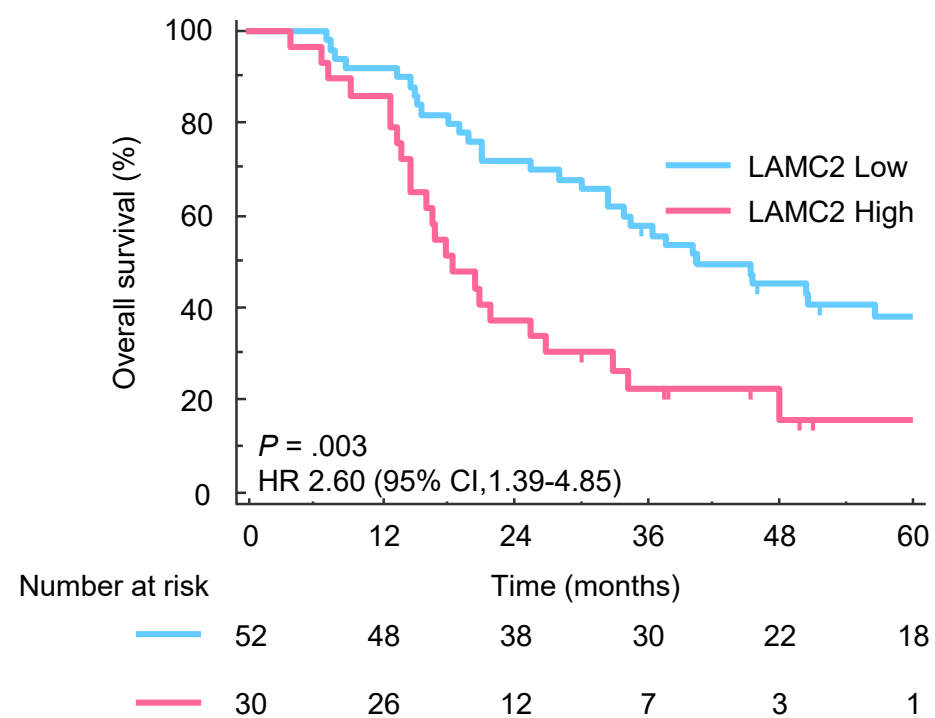

**C**

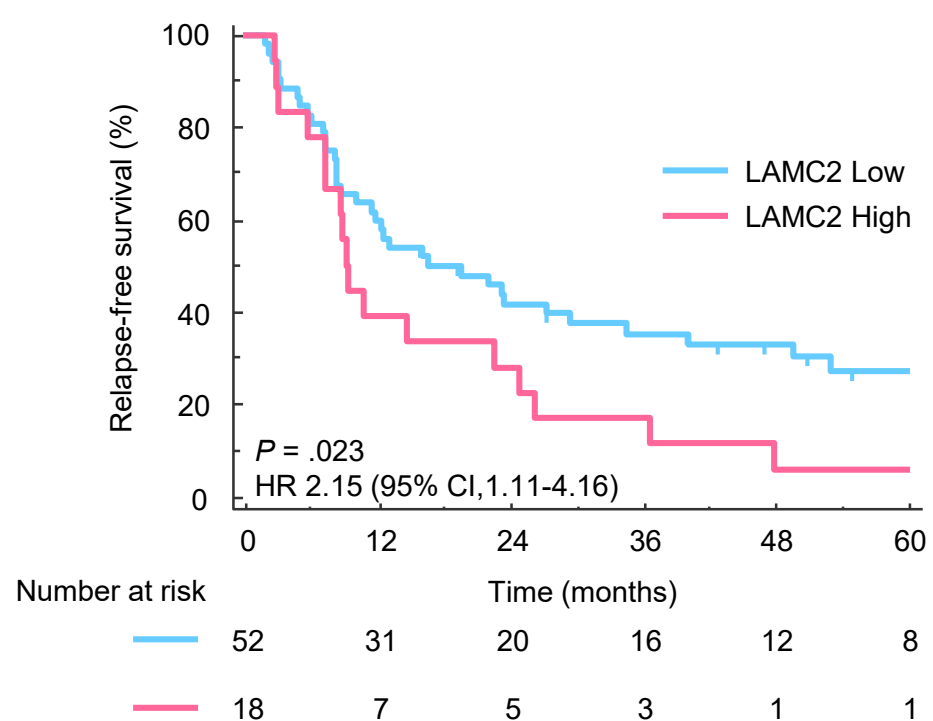

**D**

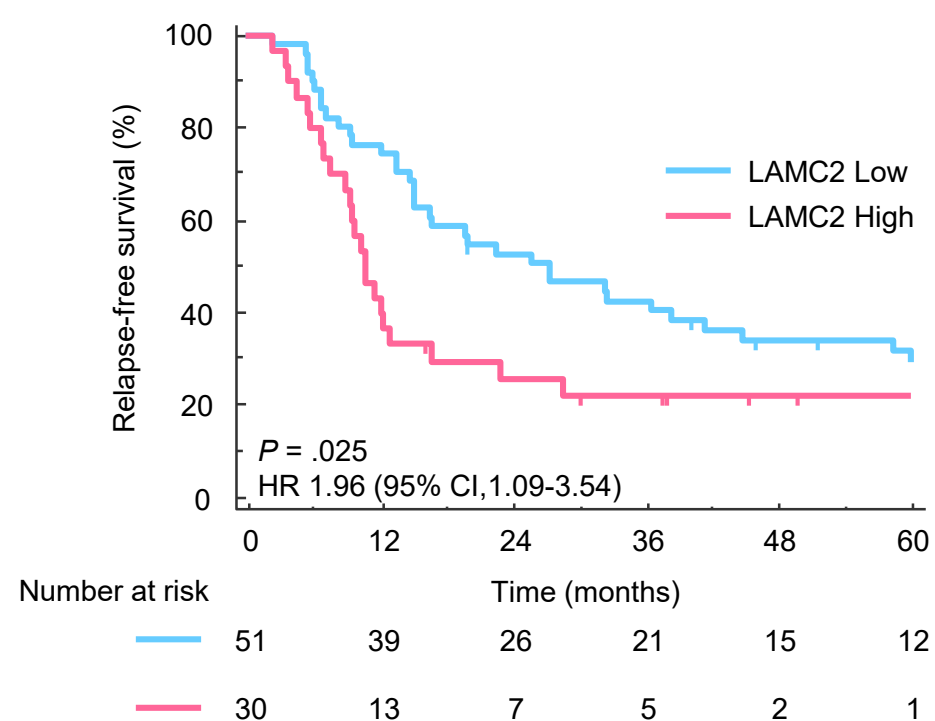

**E**

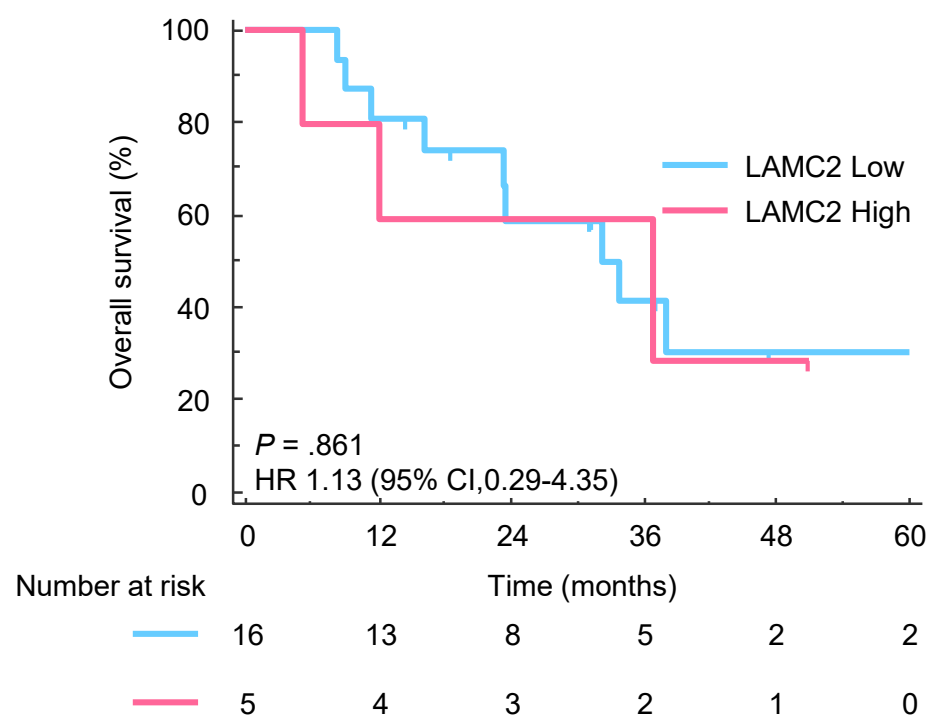

**F**

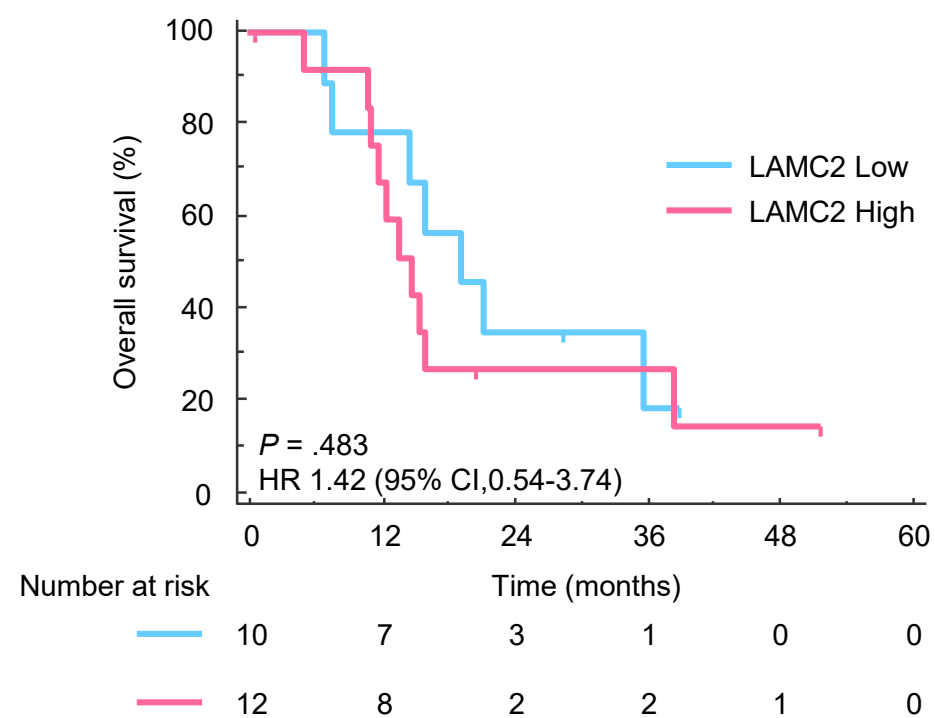

**G**

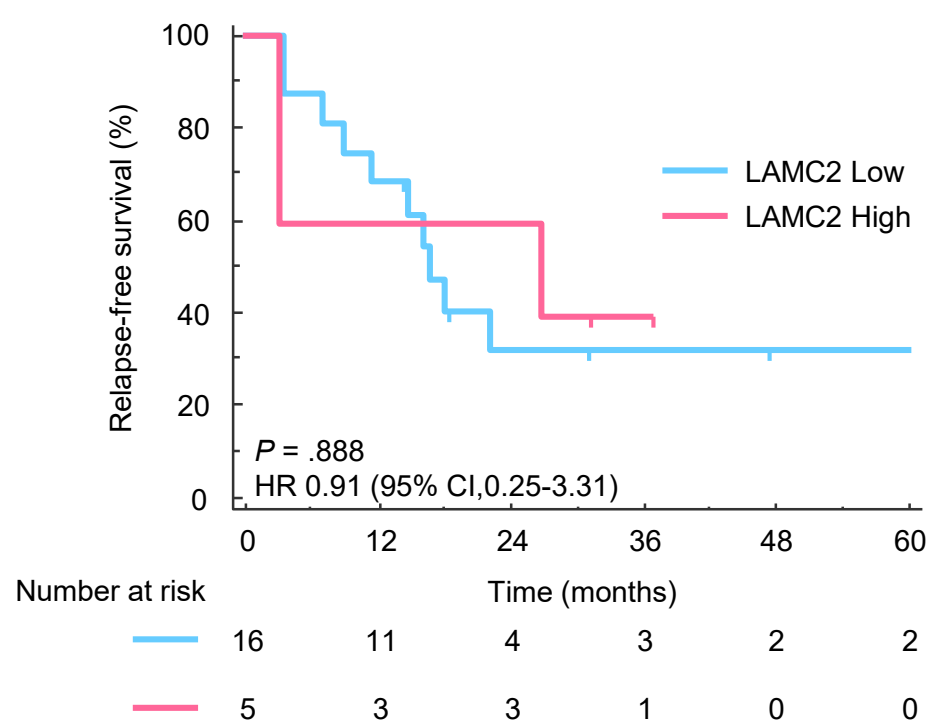

**H**

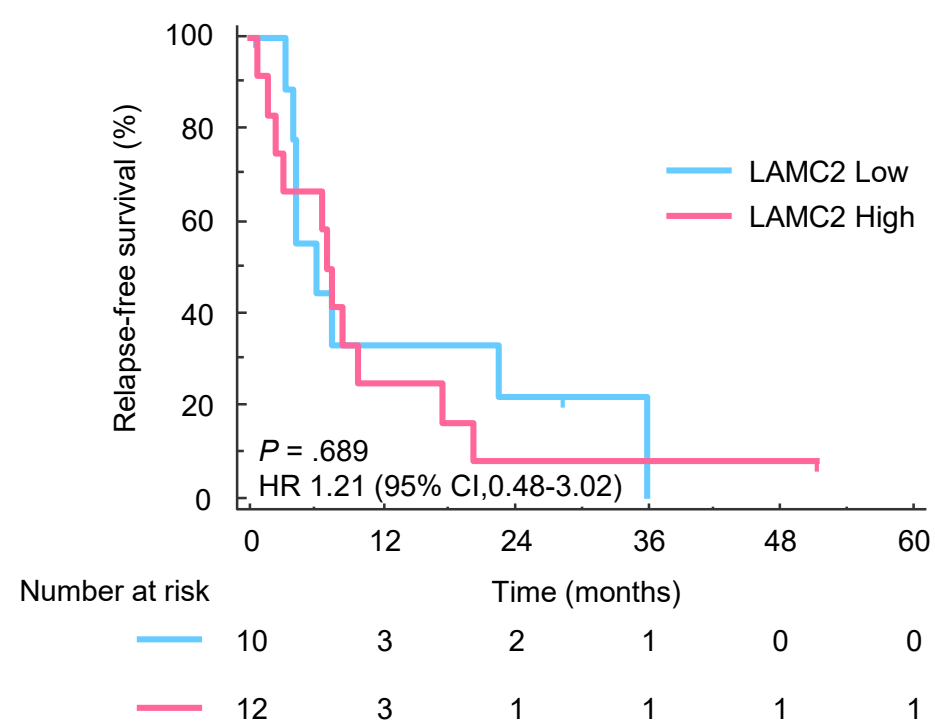

Supplementary Table 1 Extracellular matrix related gene list

A1BG  
A2M  
ABI3BP  
ABL1  
ACAN  
ACHE  
ACTB  
ACTG1  
ACVR1B  
ACVR2B  
ADAM10  
ADAM11  
ADAM12  
ADAM15  
ADAM19  
ADAM8  
ADAMDEC1  
ADAMTS1  
ADAMTS10  
ADAMTS12  
ADAMTS13  
ADAMTS14  
ADAMTS15  
ADAMTS16  
ADAMTS17  
ADAMTS18  
ADAMTS19  
ADAMTS2  
ADAMTS20  
ADAMTS3  
ADAMTS4  
ADAMTS5  
ADAMTS6  
ADAMTS7  
ADAMTS8  
ADAMTS9  
ADAMTSL1  
ADAMTSL2  
ADAMTSL3  
ADAMTSL4  
ADAMTSL5  
ADGRA2  
ADGRG1  
ADGRG6  
ADIPOQ  
ADTRP

AEBP1  
AGRN  
AGT  
AHSG  
ALPL  
AMBN  
AMBP  
AMELX  
AMELY  
AMTN  
ANG  
ANGPT1  
ANGPTL2  
ANGPTL4  
ANGPTL6  
ANOS1  
ANTXR1  
ANTXR2  
ANXA1  
ANXA11  
ANXA2  
ANXA2P2  
ANXA4  
ANXA5  
ANXA6  
ANXA7  
ANXA8  
APBB2  
APCS  
APLP1  
APOA1  
APOA4  
APOC3  
APOE  
APOH  
APP  
ARHGAP9  
ARHGDIA  
ASPN  
ATP7A  
ATXN1L  
AXL  
AZGP1  
B4GALT1  
BCAM  
BCAN  
BCAR1

BCAR3  
BCL3  
BGN  
BMP1  
BMP4  
BMP7  
BSG  
C17orf58  
C1QA  
C1QB  
C1QC  
C6orf15  
CALR  
CAPN1  
CAPN10  
CAPN11  
CAPN12  
CAPN13  
CAPN14  
CAPN15  
CAPN2  
CAPN3  
CAPN5  
CAPN6  
CAPN7  
CAPN8  
CAPN9  
CAPNS1  
CAPNS2  
CARMIL2  
CASK  
CASP3  
CAST  
CBLN1  
CBLN4  
CCBE1  
CCDC80  
CCN1  
CCN2  
CCN3  
CCN6  
CD151  
CD180  
CD248  
CD34  
CD4  
CD44



CD47  
CD55  
CD6  
CDH1  
CDH13  
CDH2  
CDON  
CER1  
CFLAR  
CFP  
CHAD  
CHADL  
CHI3L1  
CHL1  
CHRD2  
CILP  
CILP2  
CLASP1  
CLASP2  
CLC  
CLEC14A  
CLEC3B  
CLU  
CMA1  
CNMD  
COCH  
COL10A1  
COL11A1  
COL11A2  
COL12A1  
COL13A1  
COL14A1  
COL15A1  
COL16A1  
COL17A1  
COL18A1  
COL19A1  
COL1A1  
COL1A2  
COL20A1  
COL21A1  
COL22A1  
COL23A1  
COL24A1  
COL25A1  
COL26A1  
COL27A1

COL28A1  
COL2A1  
COL3A1  
COL4A1  
COL4A2  
COL4A3  
COL4A4  
COL4A5  
COL4A6  
COL5A1  
COL5A2  
COL5A3  
COL6A1  
COL6A2  
COL6A3  
COL6A5  
COL6A6  
COL7A1  
COL8A1  
COL8A2  
COL9A1  
COL9A2  
COL9A3  
COLEC12  
COLQ  
COMP  
CPA3  
CPA6  
CPB2  
CPN2  
CPZ  
CREB3L1  
CRELD1  
CRISP3  
CRISPLD2  
CRTAC1  
CRTAP  
CSGALNACT1  
CSPG4  
CST3  
CSTB  
CTHRC1  
CTRB1  
CTRB2  
CTSB  
CTSC  
CTSD

CTSF  
CTSG  
CTSH  
CTSK  
CTSL  
CTSS  
CTSV  
CTSZ  
CXCL12  
DAG1  
DAND5  
DCN  
DDR1  
DDR2  
DEFA1  
DEFA1; DEFA1B  
DGCR6  
DLG1  
DMBT1  
DMD  
DMP1  
DNAJB6  
DPP4  
DPT  
DSPP  
DST  
DUOX1  
DUOX2  
DYM  
ECM1  
ECM2  
EDIL3  
EFEMP1  
EFEMP2  
EFNA5  
EGFL6  
EGFL7  
EGFLAM  
ELANE  
ELF3  
ELFN1  
ELFN2  
ELN  
EMCN  
EMID1  
EMILIN1  
EMILIN2

EMILIN3  
ENAM  
ENG  
ENTPD2  
EPHA1  
EPN3  
EPYC  
ERBIN  
ERCC2  
ERO1A  
ERO1B  
ETS1  
EXOC8  
EYS  
F11R  
F12  
F13A1  
F2  
F3  
F7  
F9  
FAP  
FBLIM1  
FBLN1  
FBLN2  
FBLN5  
FBLN7  
FBN1  
FBN2  
FBN3  
FCN1  
FER  
FERMT1  
FERMT2  
FGA  
FGB  
FGF1  
FGF10  
FGF2  
FGF20  
FGF9  
FGFBP1  
FGFBP3  
FGFR1  
FGFR2  
FGFR4  
FGG

FGL2  
FLG  
FLNA  
FLNC  
FLOT1  
FLRT1  
FLRT2  
FLRT3  
FLT4  
FMOD  
FN1  
FOXF1  
FOXF2  
FRAS1  
FREM1  
FREM2  
FREM3  
FSCN1  
FURIN  
FZD4  
GAS6  
GDF10  
GDF15  
GFOD2  
GH1  
GLDN  
GLG1  
GOLGA7B  
GOLM1  
GP1BA  
GPC1  
GPC2  
GPC3  
GPC4  
GPC5  
GPC6  
GPLD1  
GPM6B  
GREM1  
HAPLN1  
HAPLN2  
HAPLN3  
HAPLN4  
HAS1  
HAS2  
HAS3  
HDGF

HMCN1  
HMCN2  
HNRNPM  
HPSE  
HPSE2  
HPX  
HRG  
HRNR  
HSD17B12  
HSP90B1  
HSPG2  
HTRA1  
HTRA3  
I6L893  
IBSP  
ICAM1  
ICAM2  
ICAM3  
ICAM4  
ICAM5  
IFNA2  
IGF1R  
IGFALS  
IGFBP7  
IHH  
IL6  
IL7  
ILK  
IMPG1  
IMPG2  
INHBE  
ITGA1  
ITGA10  
ITGA11  
ITGA2  
ITGA2B  
ITGA3  
ITGA4  
ITGA5  
ITGA6  
ITGA7  
ITGA8  
ITGA9  
ITGAD  
ITGAE  
ITGAL  
ITGAM

ITGAV  
ITGAX  
ITGB1  
ITGB2  
ITGB3  
ITGB4  
ITGB5  
ITGB6  
ITGB7  
ITGB8  
ITIH1  
ITIH2  
ITIH4  
ITIH5  
JAM2  
JAM3  
KAZALD1  
KDR  
KERA  
KIF9  
KLK2  
KLK4  
KLK5  
KLK6  
KLK7  
KLK8  
KLKB1  
KNG1  
KRT1  
L1CAM  
LAD1  
LAIR1  
LAMA1  
LAMA2  
LAMA3  
LAMA4  
LAMA5  
LAMB1  
LAMB2  
LAMB3  
LAMB4  
LAMC1  
LAMC2  
LAMC3  
LCP1  
LDLRAD4  
LEFTY2

LGALS1  
LGALS3  
LGALS3BP  
LGALS4  
LGALS8  
LGALS9  
LIMS1  
LIMS2  
LINGO1  
LINGO2  
LINGO3  
LINGO4  
LMAN1  
LMAN1L  
LOX  
LOXL1  
LOXL2  
LOXL4  
LPL  
LPP  
LRIG1  
LRIG2  
LRIG3  
LRP1  
LRP2  
LRRC15  
LRRC17  
LRRC24  
LRRC32  
LRRC3B  
LRRC3C  
LRRN1  
LRRN2  
LRRN3  
LRRTM1  
LRRTM3  
LRRTM4  
LTBP1  
LTBP2  
LTBP3  
LTBP4  
LUM  
MADCAM1  
MAMDC2  
MARCO  
MARCOL  
MATN1



MATN2  
MATN3  
MATN4  
MBL2  
MDK  
MEGF9  
MELTF  
MEP1B  
MEPE  
MERTK  
MET  
MFAP1  
MFAP2  
MFAP4  
MFAP5  
MFG8  
MGAT5  
MGP  
MKLN1  
MMP1  
MMP10  
MMP11  
MMP12  
MMP13  
MMP14  
MMP15  
MMP16  
MMP17  
MMP19  
MMP2  
MMP20  
MMP21  
MMP23B  
MMP24  
MMP25  
MMP26  
MMP27  
MMP28  
MMP3  
MMP7  
MMP8  
MMP9  
MMRN1  
MMRN2  
MPZL3  
MRC2  
MSANTD3-TMEFF1

MST1  
MST1R  
MUC15  
MUC17  
MUC2  
MUC3A  
MUC4  
MUC5AC  
MUC6  
MXRA5  
MXRA7  
MYF5  
MYOC  
NAV2  
NBL1  
NCAM1  
NCAN  
NCSTN  
NDNF  
NDP  
NF1  
NFKB2  
NID1  
NID2  
NOTCH1  
NOX1  
NOXO1  
NPNT  
NPPA  
NR2E1  
NRAP  
NRROS  
NTN1  
NTN3  
NTN4  
NTN5  
NYX  
OC90  
OGN  
OLFML2A  
OMD  
OPTC  
ORM1  
ORM2  
OTOA  
OTOL1  
P3H1

P3H2  
PALLD  
PARVA  
PARVB  
PCOLCE  
PCSK6  
PDGFA  
PDGFB  
PDGFD  
PDGFRA  
PDPN  
PECAM1  
PF4  
PHEX  
PHOSPHO1  
PI3  
PIK3CA  
PKM  
PLG  
PLGLA  
PLGLB1; PLGLB2  
PLOD3  
PLSCR1  
PMEPA1  
PODN  
PODNL1  
POMT1  
POSTN  
PPIB  
PRDM5  
PRDX4  
PRELP  
PRG2  
PRG3  
PRG4  
PRKCE  
PRSS1  
PRSS2  
PRSS36  
PRTN3  
PSAP  
PSEN1  
PTK2  
PTN  
PTPRZ1  
PTX3  
PXDN

PXN  
PZP  
QSOX1  
RACK1  
RARRES2  
RB1  
RBP3  
RCC2  
RECK  
RELL2  
RELN  
RGCC  
RPSA  
RPTN  
RRP1B  
RTBDN  
RTN4RL1  
RTN4RL2  
S100A10  
S100A4  
S100A6  
S100A7  
S100A8  
S100A9  
SBSPON  
SCARA3  
SCUBE1  
SCUBE3  
SDC2  
SDC3  
SEMA3B  
SEMA3E  
SEMA7A  
SERAC1  
SERPINA1  
SERPINA3  
SERPINA5  
SERPINB1  
SERPINB12  
SERPINB5  
SERPINB6  
SERPINB8  
SERPINB9  
SERPINC1  
SERPINE1  
SERPINE2  
SERPINF1

SERPINF2  
SERPING1  
SERPINH1  
SFRP1  
SFRP2  
SFTPA1  
SFTPA2  
SFTPD  
SGCA  
SGCB  
SGCD  
SGCE  
SGCG  
SGCZ  
SH3PXD2A  
SH3PXD2B  
SHH  
SLC10A7  
SLC20A1  
SLC20A2  
SLC35D1  
SLC39A5  
SLPI  
SMAD3  
SMAD4  
SMOC1  
SMOC2  
SMPD3  
SNORC  
SNTA1  
SOD3  
SORBS3  
SORL1  
SORT1  
SOST  
SOX9  
SPACA3  
SPARC  
SPARCL1  
SPINK5  
SPINT1  
SPOCK1  
SPOCK2  
SPOCK3  
SPON1  
SPON2  
SPP1

SPP2  
SRC  
SRPX  
SRPX2  
SSC5D  
SSPN  
ST14  
ST7  
STAB2  
STATH  
SULF1  
TCF15  
TECTA  
TECTB  
TEK  
TFF3  
TFIP11  
TFPI2  
TGFB1  
TGFB111  
TGFB2  
TGFB3  
TGFB1  
TGFB1  
TGFB2  
TGFB3  
TGM2  
TGM4  
THBS1  
THBS2  
THBS3  
THBS4  
THSD4  
TIMP1  
TIMP2  
TIMP3  
TIMP4  
TINAG  
TINAGL1  
TLL1  
TLL2  
TLR3  
TMEFF1  
TMEFF2  
TMEM150B  
TMEM38B  
TMPRSS6

TNC  
TNF  
TNFAIP6  
TNFRSF11B  
TNFRSF1A  
TNFRSF1B  
TNN  
TNR  
TNXB  
TPSAB1  
TPSB2  
TRIL  
TTR  
TUFT1  
TYRO3  
UCMA  
USH2A  
VASN  
VASP  
VCAM1  
VCAN  
VEGFA  
VEGFB  
VIT  
VLDLR  
VTN  
VWA1  
VWA2  
VWC2  
VWF  
WASHC1  
WISP1  
WISP2  
WNT1  
WNT10A  
WNT10B  
WNT11  
WNT16  
WNT2  
WNT2B  
WNT3  
WNT3A  
WNT4  
WNT5A  
WNT5B  
WNT6  
WNT7A

WNT7B  
WNT8A  
WNT8B  
WNT9A  
WNT9B  
ZBTB7B  
ZG16  
ZNF410  
ZP1  
ZP2  
ZP3  
ZP4  
ZPLD1
